# Supplementary material
Source: Springer Nature journal article supplement (https://www.springermedizin.de/resource/supplementary/12916_2013_910_MOESM4_ESM.pdf/9598806)

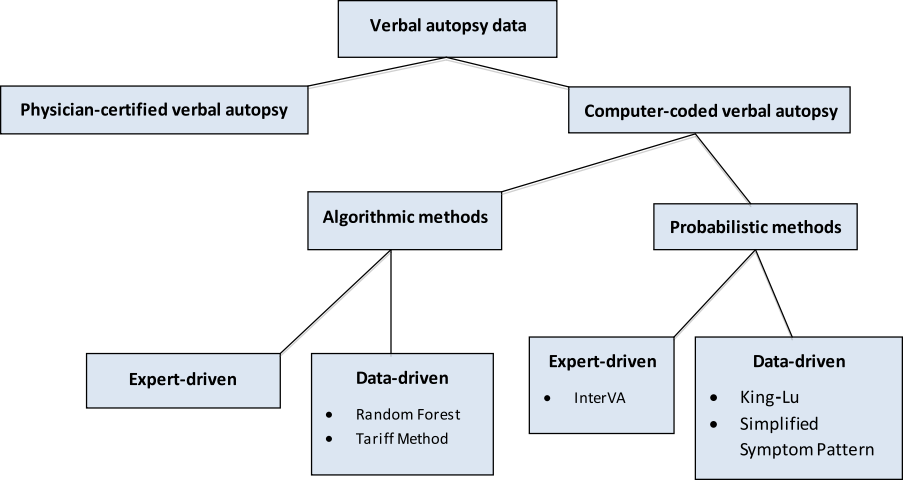

Supplement: MOESM4 [file 9598806]
